# Supplementary material for: Characterization of Ionotropic Receptor Gene EonuIR25a in the Tea Green Leafhopper, Empoasca onukii Matsuda
Source: MDPI journal article supplement (doi:10.3390/plants12102034), 2023-05-19
Supplement: s1 [file s1]

# Supplementary Material

Characterization of Ionotropic Receptor Gene *EonuIR25a* in the Tea Green Leafhopper,

*Empoasca onukii* Matsuda

Ruirui Zhang<sup>1</sup>, Xiaoyue Lun<sup>1</sup>, Yu Zhang<sup>1</sup>, Yunhe Zhao<sup>1</sup>, Xiuxiu Xu<sup>2\*</sup>, Zhengqun Zhang<sup>1\*</sup>

\* Correspondence: Xiuxiu Xu<sup>2\*</sup>, yuayu88-66@163.com ;Zhengqun Zhang<sup>1\*</sup>, zqzhang@sdau.edu.cn

## 1. Supplementary Tables

**Table S1.** Amino acid composition of the *EonuIR25a* protein

| Amino acid        | Number/Percentage (%) |
|-------------------|-----------------------|
| Alanine (A)       | 6.2%                  |
| Arginine (R)      | 5.0%                  |
| Asparagine (N)    | 4.0%                  |
| Asparticacid (D)  | 5.7%                  |
| Cysteine (C)      | 1.4%                  |
| Glutamine (Q)     | 5.0%                  |
| Glutamicacid (E)  | 6.9%                  |
| Glycine (G)       | 3.8%                  |
| Histidine (H)     | 1.0%                  |
| Isoleucine (I)    | 5.2%                  |
| Leucine (L)       | 10.2%                 |
| Lysine (K)        | 7.4%                  |
| Methionine (M)    | 2.6%                  |
| Phenylalanine (F) | 5.0%                  |
| Proline (P)       | 4.8%                  |
| Serine (S)        | 8.3%                  |
| Threonine (T)     | 4.5%                  |
| Tryptophan (W)    | 3.1%                  |
| Tyrosine (Y)      | 4.3%                  |
| Valine (V)        | 5.7%                  |
